# Supplementary material
Source: PubMed Central journal article supplement (PMC3611854)
Supplement: supp_djs527_jnci_JNCI_12_1057_s01.pdf [file supp_djs527_jnci_JNCI_12_1057_s01.pdf]

## Supplementary Material

### Surrogate endpoint analysis: An exercise in extrapolation

Stuart G. Baker, Barnett S. Kramer

This supplementary material illustrates computation of the standard error multiplier for the second example mentioned in the main text, namely  $k = 10$  historical trials that investigated treatments for advanced colorectal cancer [1-3]. Let  $\tau_S$  and  $\tau_T$  denote pre-specified survival times for determining surrogate and true endpoints, respectively. For trial  $j$  and randomization group  $z$ , let  $S_{jz}$  denote the estimated probability of surviving a surrogate event to time  $\tau_S$ , and let  $T_{jz}$  denote the estimated probability of surviving a true event to time  $\tau_T$ . In this example  $S_{jz}$  is the estimated probability of no cancer progression by 6 months, and  $T_{jz}$  is the estimated probability of no mortality from any cause by 12 months. Survival probabilities were estimated using a discrete-time Kaplan-Meier estimate. The first seven trials listed in Supplementary Tables 1 and 2 compare fluorouracil and leucovorin with fluorouracil; the last three trials compare fluorouracil and leucovorin with raltitrexed. Ideally, in other applications, there would be a greater variety of treatments among the historical trials.

In this notation, the surrogate result is  $\Delta S_j = S_{j1} - S_{j0}$  and the true result is  $\Delta T_j = T_{j1} - T_{j0}$ . With estimated survival probabilities computed via Kaplan-Meier, a simple approximation for the standard error of the true result is  $se\Delta T_j = \{T_{j1}(1 - T_{j0})/n_{j0} + T_{j1}(1 - T_{j1})/n_{j1}\}^{1/2}$ , where  $n_{jz}$  is the sample size in group  $z$  [1]. Supplementary Table 1 shows calculations of surrogate and true results based on published data in supplementary material from Baker *et al.* [1].

For the leave-one-out analysis, each historical trial  $j$  is successively removed and the following regression model is fit to data from the remaining  $k - 1$  historical trials indexed by  $u$ ,

$$\Delta T_u = \beta_j \Delta S_u + \varepsilon_j,$$

where  $\varepsilon_j$  is random error. To give more weight to larger trials, the regression model is fit using weights of  $n_{u0} + n_{u1}$  for each remaining historical trial  $u$ . Let  $b_j$  denote the estimate of  $\beta_j$ . The model result is  $\Delta Q_j = Q_{j1} - Q_{j0}$ , where  $Q_{jz} = b_j S_{jz}$ . The estimated variance of the model result is  $var\Delta Q_j = Q_{j1}(1 - Q_{j0}) / n_{j0} + Q_{j1}(1 - Q_{j1}) / n_{j1}$ . The extrapolation error for historical trial  $j$  is the difference between the true result and the model result, namely  $E_j = \Delta T_j - \Delta Q_j$ . For historical trial  $j$ , the mean and variance of the extrapolation error based on the remaining  $k-1$  trials are

$$meanE_j = \sum_{u \neq j} E_u / (k - 1),$$

$$varE_j = \sum_{u \neq j} (E_u - meanE_j)^2 / (k - 2).$$

The predicted result is the model result plus the mean of the extrapolation error,  $\Delta P_j = \Delta Q_j + meanE_j$ . The variance of the predicted result equals the variance of the model result plus the variance of the extrapolation error,  $var\Delta P_j = var\Delta Q_j + varE_j$ . The standard error of the predicted result is  $se\Delta P_j = var\Delta P_j^{1/2}$ . Supplementary Table 2 presents some of these calculations. From the above calculations,

$$\text{standard error multiplier} = \sum_j (se\Delta P_j / se\Delta T_j) / k.$$

If the questions relating to extrapolation estimation are satisfactorily answered, the predicted result and its 95% confidence interval would be computed for a new trial. The calculations parallel those given above, but using all  $k$  historical trials to compute the model result.

## References

1. Baker, SG, Sargent DJ, Buyse M, Burzykowski T. Predicting treatment effect from surrogate endpoints and historical trials: an extrapolation involving probabilities of a binary outcome or survival to a specific time. *Biometrics*. 2012;68(1):248-257.
2. Buyse M, Burzykowski T, Carroll K, Michiels S, Sargent D, Miller LL, Elfring GL, Pignon JP, Piedbois P. Progression-free survival is a surrogate for survival in advanced colorectal cancer. *J Clin Oncol*. 2007;25(33):5218-5224.
3. Meta-Analysis Group in Cancer (2004). Modulation of fluorouracil by leucovorin in patients with advanced colorectal cancer: an updated meta-analysis. *J Clin Oncol*. 22;(18):3766-3775.

| Trial | Surrogate endpoint |          | True endpoint |          | Sample size |          | Surrogate result | True result | SE of true result |
|-------|--------------------|----------|---------------|----------|-------------|----------|------------------|-------------|-------------------|
|       | Group              |          | Group         |          | Group       |          |                  |             |                   |
|       | 0                  | 1        | 0             | 1        | 0           | 1        |                  |             |                   |
|       | $S_{i0}$           | $S_{i1}$ | $T_{i0}$      | $T_{i1}$ | $n_{i0}$    | $n_{i1}$ |                  |             |                   |
| 1     | 0.346              | 0.686    | 0.022         | 0.223    | 49          | 99       | 0.340            | 0.201       | 0.047             |
| 2     | 0.319              | 0.518    | 0.348         | 0.518    | 69          | 137      | 0.199            | 0.170       | 0.071             |
| 3     | 0.451              | 0.511    | 0.352         | 0.489    | 91          | 94       | 0.060            | 0.138       | 0.072             |
| 4     | 0.356              | 0.417    | 0.526         | 0.526    | 164         | 326      | 0.061            | 0.000       | 0.048             |
| 5     | 0.466              | 0.484    | 0.522         | 0.570    | 178         | 93       | 0.018            | 0.047       | 0.064             |
| 6     | 0.681              | 0.783    | 0.433         | 0.513    | 157         | 152      | 0.102            | 0.080       | 0.057             |
| 7     | 0.440              | 0.618    | 0.517         | 0.662    | 67          | 68       | 0.178            | 0.145       | 0.084             |
| 8     | 0.264              | 0.357    | 0.431         | 0.471    | 246         | 243      | 0.093            | 0.040       | 0.045             |
| 9     | 0.227              | 0.397    | 0.371         | 0.522    | 216         | 206      | 0.169            | 0.151       | 0.048             |
| 10    | 0.316              | 0.326    | 0.416         | 0.413    | 222         | 212      | 0.010            | -0.003      | 0.047             |

Supplementary Table 1. Computation of surrogate and true results.  $S_{jz}$  is the estimated probability of no cancer progression by 6 months, and  $T_{jz}$  is the estimated probability of no mortality from any cause by 12 months. The first seven trials compare fluoracil and leucovorin with fluoracil; the last three trials compare fluoracil and leucovorin with raltitrexed.

| Trial | Slope of regression model | Model result |                       | Extrapolation error |                | Predicted result |                       |
|-------|---------------------------|--------------|-----------------------|---------------------|----------------|------------------|-----------------------|
|       |                           | Mean         | SE                    | Mean                | SE             | Estimate         | SE                    |
|       | $b_j$                     | $\Delta Q_j$ | $var\Delta Q_j^{1/2}$ | $meanE_j$           | $varE_j^{1/2}$ | $\Delta P_j$     | $var\Delta P_j^{1/2}$ |
| 1     | 0.79                      | 0.268        | 0.081                 | 0.015               | 0.042          | 0.284            | 0.091                 |
| 2     | 0.699                     | 0.139        | 0.065                 | 0.0042              | 0.049          | 0.144            | 0.081                 |
| 3     | 0.703                     | 0.042        | 0.069                 | -0.003              | 0.038          | 0.039            | 0.079                 |
| 4     | 0.75                      | 0.046        | 0.043                 | 0.0130              | 0.046          | 0.058            | 0.063                 |
| 5     | 0.72                      | 0.013        | 0.061                 | 0.0037              | 0.049          | 0.016            | 0.078                 |
| 6     | 0.72                      | 0.073        | 0.057                 | 0.0069              | 0.050          | 0.080            | 0.076                 |
| 7     | 0.715                     | 0.127        | 0.083                 | 0.0057              | 0.050          | 0.133            | 0.097                 |
| 8     | 0.749                     | 0.069        | 0.038                 | 0.0110              | 0.048          | 0.080            | 0.062                 |
| 9     | 0.673                     | 0.114        | 0.039                 | 0.0035              | 0.049          | 0.117            | 0.063                 |
| 10    | 0.724                     | 0.0074       | 0.041                 | 0.0088              | 0.05           | 0.016            | 0.064                 |

Supplementary Table 2. Computation of predicted results. The first seven trials compare fluouracil and leucovorin with fluouracil; the last three trials compare fluouracil and leucovorin with raltitrexed.
